# Supplementary material for: Educational interventions are associated with improvements in colonoscopy quality indicators: a systematic review and meta-analysis
Source: PubMed Central journal article supplement — Endosc Int Open. 2020 Sep 22;8(10):E1321–31. doi: 10.1055/a-1221-4922 (PMC7508648; doi:10.1055/a-1221-4922), 2020-09-22
Supplement: 1895supmat_10-1055-a-1221-4922.pdf [file 1895supmat_10-1055-a-1221-4922.pdf]

## Supplementary material

### SUPPLEMENTARY FIGURES

**Supplementary Figure 1. Prisma study flow diagram.** From: Moher D, Liberati A, Tetzlaff J, Altman DG, The PRISMA Group (2009). Preferred Reporting Items for Systematic Reviews and Meta-Analyses: The PRISMA Statement. PLoS Med 6(7): e1000097. doi:10.1371/journal.pmed1000097

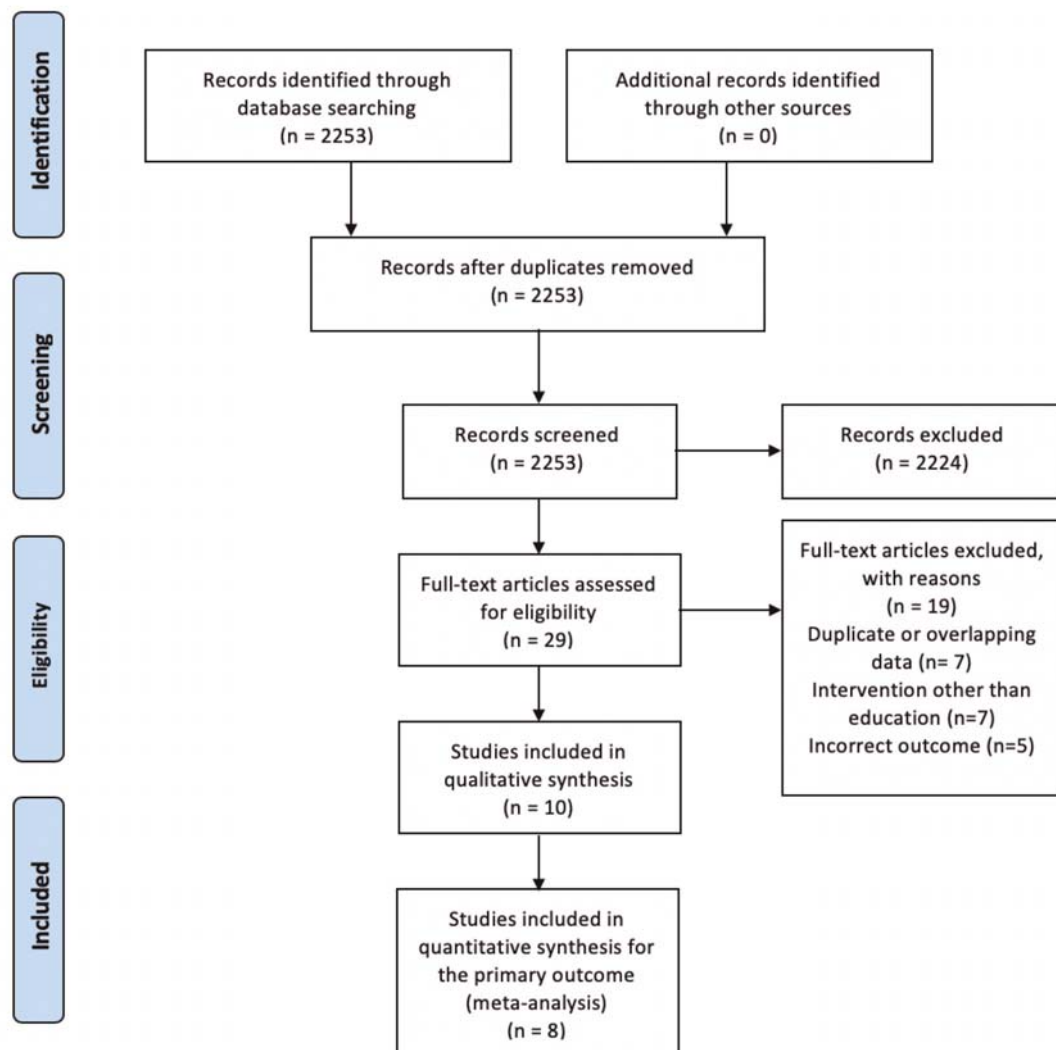

## Supplementary material

Supplementary Figure 2. Risk of bias for randomized controlled trials.[23]

|               | Random sequence generation (selection bias) | Allocation concealment (selection bias) | Blinding of participants and personnel (performance bias) | Blinding of outcome assessment (detection bias) | Incomplete outcome data (attrition bias) | Selective reporting (reporting bias) | Other bias |
|---------------|---------------------------------------------|-----------------------------------------|-----------------------------------------------------------|-------------------------------------------------|------------------------------------------|--------------------------------------|------------|
| Coe 2013      | ⊖                                           | ?                                       | ⊖                                                         | ?                                               | ⊕                                        | ⊕                                    | ⊕          |
| Kaminski 2016 | ⊕                                           | ⊕                                       | ⊕                                                         | ⊖                                               | ⊕                                        | ⊕                                    | ⊖          |
| Wallace 2017  | ⊖                                           | ⊖                                       | ⊕                                                         | ⊖                                               | ⊕                                        | ⊕                                    | ⊖          |

## Supplementary material

## Supplementary Figure 3. Forest plots for subgroup analyses:

## a) Lag time: specified vs. unclear or no lag time

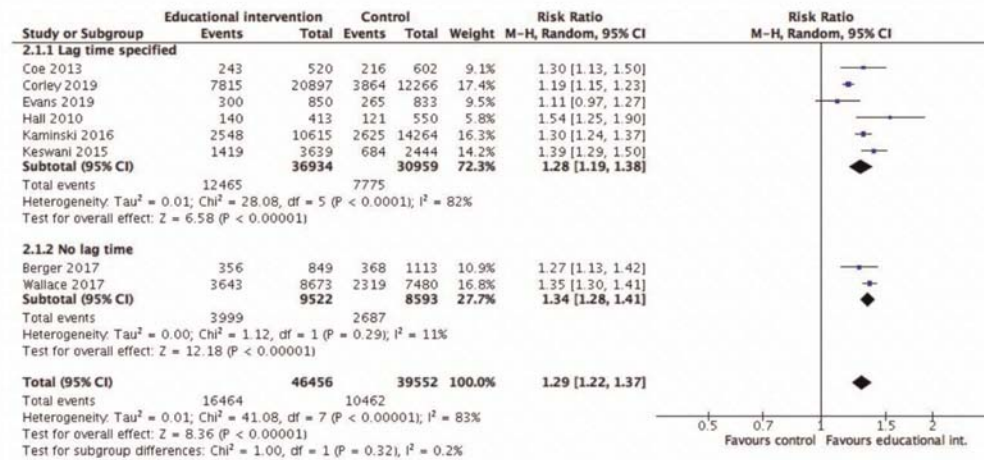

## b) Indication for colonoscopy

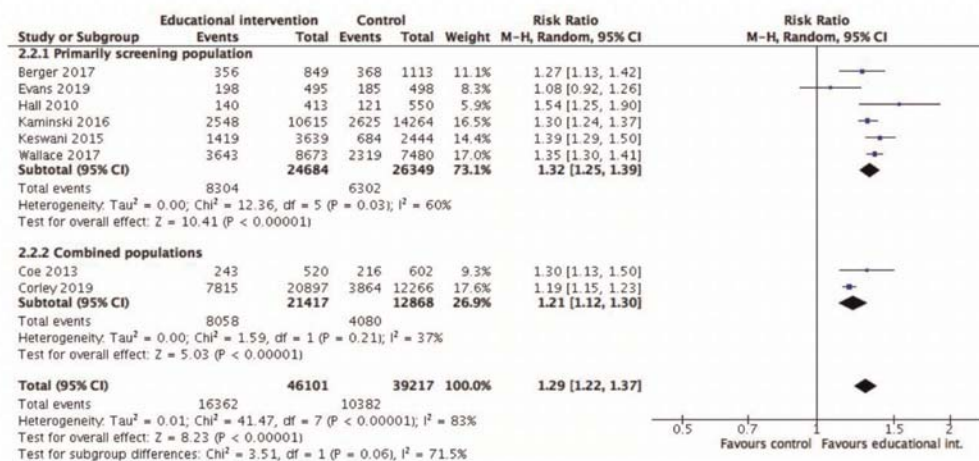

## Supplementary material

## c) Full text vs. abstract

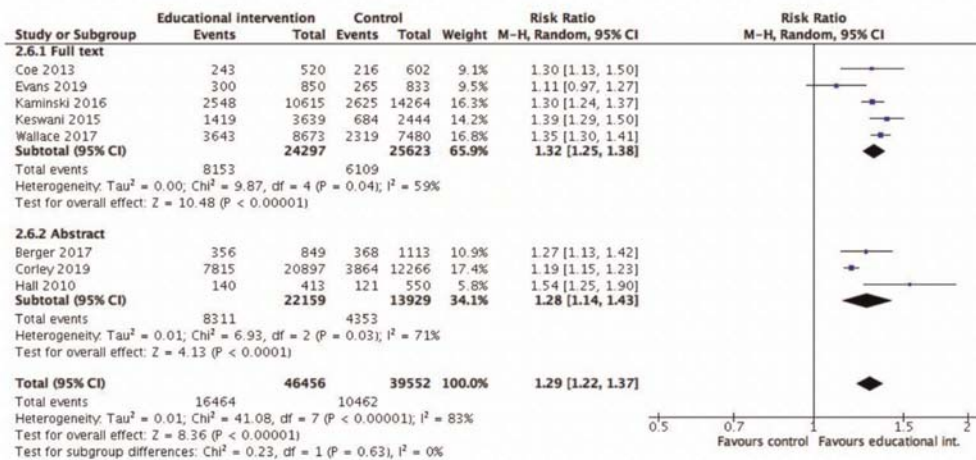

## d) RCTs vs. observational (original design with before and after comparisons for the RCTs).

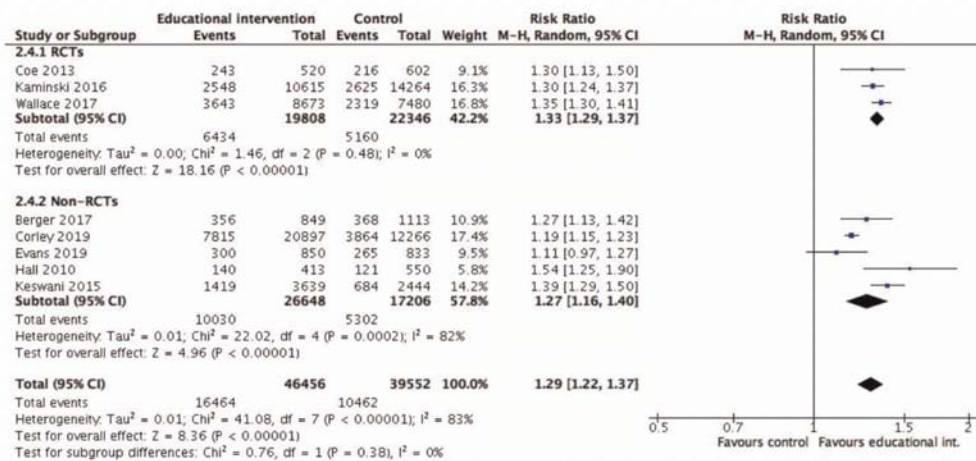

## Supplementary material

## e) EQUIP-based strategies vs. others

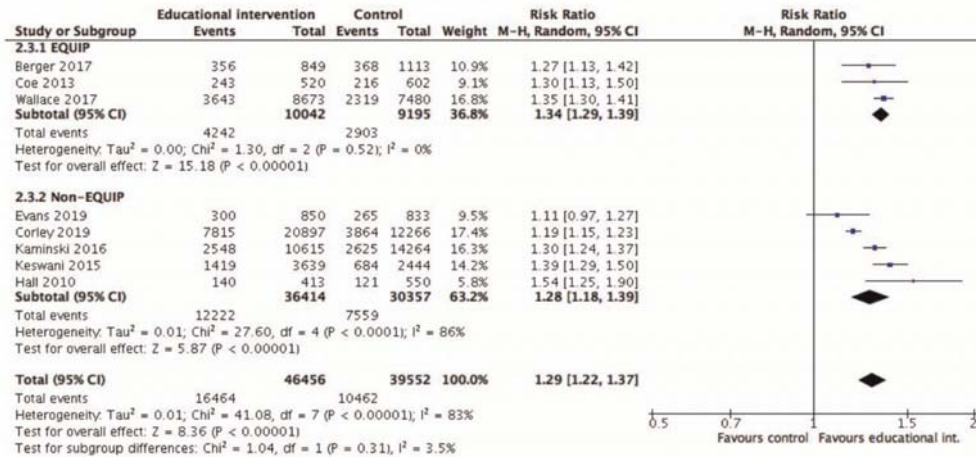

## f) Hands-On vs. No hands-on educational interventions

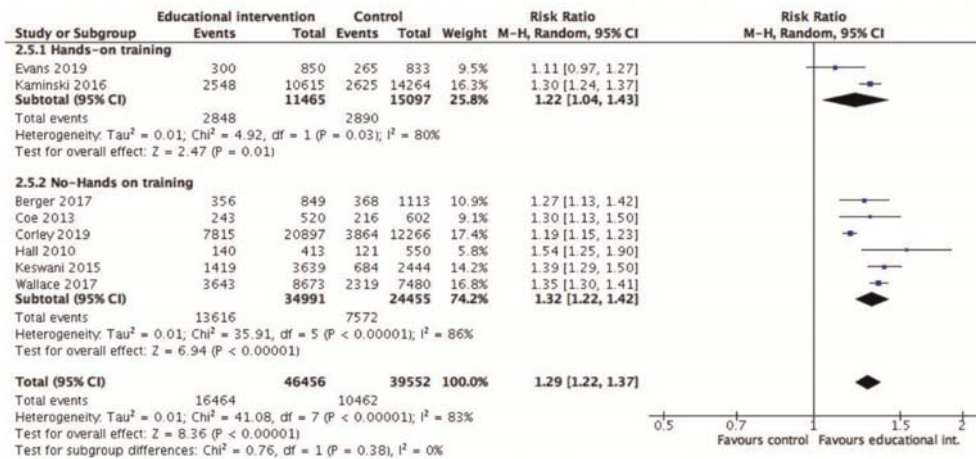



## Supplementary material

## g) Multicenter vs. Single Center

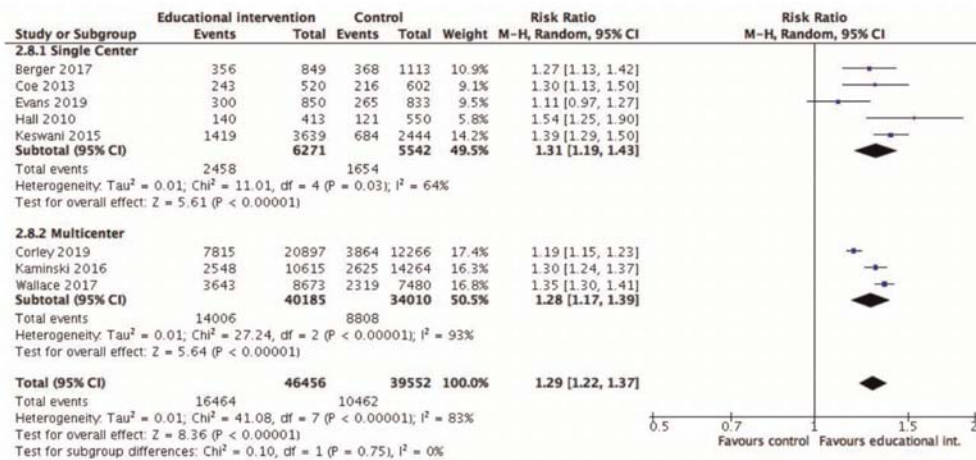

## h) RCTs with randomized to experimental and control groups data

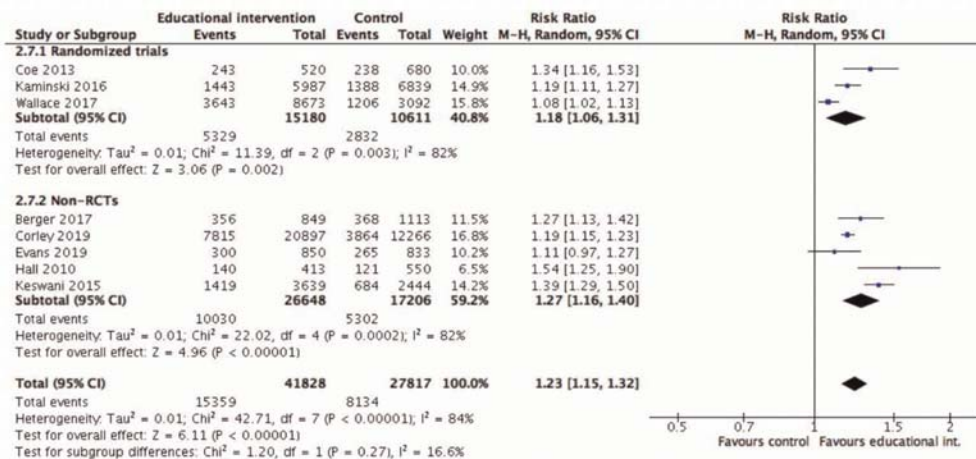

## Supplementary material

### i) Studies with interventions with and without concomitant feedback

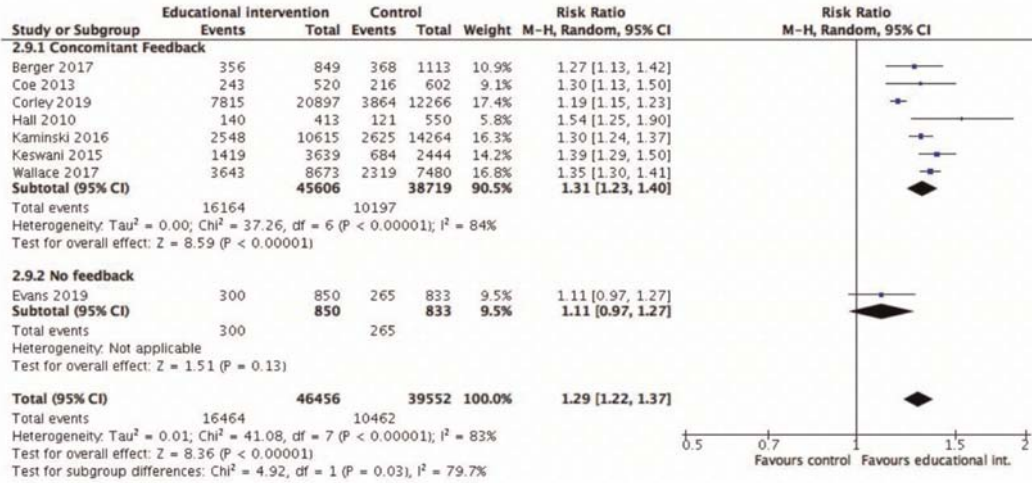

Supplementary Figure 4. Funnel plot for analysis of primary outcome (ADR).

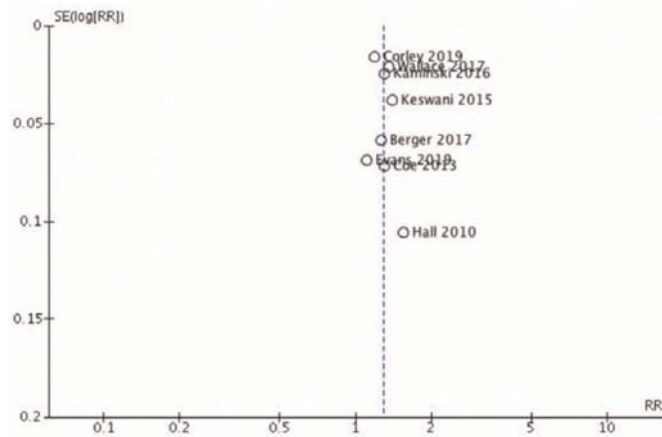

## Supplementary material

**Supplementary Table 1** PRISMA checklist [20]. From: Moher D, Liberati A, Tetzlaff J, Altman DG, The PRISMA Group (2009). Preferred Reporting Items for Systematic Reviews and Meta-Analyses: The PRISMA Statement. PLoS Med 6(7): e1000097. doi:10.1371/journal.pmed1000097

| <b>TITLE</b>              |   |                                                                                                                                                                                                                                                                                                             |            |
|---------------------------|---|-------------------------------------------------------------------------------------------------------------------------------------------------------------------------------------------------------------------------------------------------------------------------------------------------------------|------------|
| Title                     | 1 | Identify the report as a systematic review, meta-analysis, or both.                                                                                                                                                                                                                                         | Title page |
| <b>ABSTRACT</b>           |   |                                                                                                                                                                                                                                                                                                             |            |
| Structured summary        | 2 | Provide a structured summary including, as applicable: background; objectives; data sources; study eligibility criteria, participants, and interventions; study appraisal and synthesis methods; results; limitations; conclusions and implications of key findings; systematic review registration number. | 1-2        |
| <b>INTRODUCTION</b>       |   |                                                                                                                                                                                                                                                                                                             |            |
| Rationale                 | 3 | Describe the rationale for the review in the context of what is already known.                                                                                                                                                                                                                              | 3-4        |
| Objectives                | 4 | Provide an explicit statement of questions being addressed with reference to participants, interventions, comparisons, outcomes, and study design (PICOS).                                                                                                                                                  | 4          |
| <b>METHODS</b>            |   |                                                                                                                                                                                                                                                                                                             |            |
| Protocol and registration | 5 | Indicate if a review protocol exists, if and where it can be accessed (e.g., Web address), and, if available, provide registration information including registration number.                                                                                                                               | 4          |
| Eligibility criteria      | 6 | Specify study characteristics (e.g., PICOS, length of follow-up) and report characteristics (e.g., years considered, language, publication status) used as criteria for eligibility, giving rationale.                                                                                                      | 5          |
| Information sources       | 7 | Describe all information sources (e.g., databases with dates of coverage, contact with study authors to identify additional studies) in the search and date last searched.                                                                                                                                  | 4          |



## Supplementary material

|                                    |    |                                                                                                                                                                                                                        |                          |
|------------------------------------|----|------------------------------------------------------------------------------------------------------------------------------------------------------------------------------------------------------------------------|--------------------------|
| Search                             | 8  | Present full electronic search strategy for at least one database, including any limits used, such that it could be repeated.                                                                                          | Supplementary appendix 2 |
| Study selection                    | 9  | State the process for selecting studies (i.e., screening, eligibility, included in systematic review, and, if applicable, included in the meta-analysis).                                                              | 5                        |
| Data collection process            | 10 | Describe method of data extraction from reports (e.g., piloted forms, independently, in duplicate) and any processes for obtaining and confirming data from investigators.                                             | 6                        |
| Data items                         | 11 | List and define all variables for which data were sought (e.g., PICOS, funding sources) and any assumptions and simplifications made.                                                                                  | 6                        |
| Risk of bias in individual studies | 12 | Describe methods used for assessing risk of bias of individual studies (including specification of whether this was done at the study or outcome level), and how this information is to be used in any data synthesis. | 6                        |
| Summary measures                   | 13 | State the principal summary measures (e.g., risk ratio, difference in means).                                                                                                                                          | 6                        |
| Synthesis of results               | 14 | Describe the methods of handling data and combining results of studies, if done, including measures of consistency (e.g., $I^2$ ) for each meta-analysis.                                                              | 6-7                      |
| Risk of bias across studies        | 15 | Specify any assessment of risk of bias that may affect the cumulative evidence (e.g., publication bias, selective reporting within studies).                                                                           | 7                        |
| Additional analyses                | 16 | Describe methods of additional analyses (e.g., sensitivity or subgroup analyses, meta-regression), if done, indicating which were pre-specified.                                                                       | 7-8                      |
| <b>RESULTS</b>                     |    |                                                                                                                                                                                                                        |                          |
| Study selection                    | 17 | Give numbers of studies screened, assessed for eligibility, and included in the review, with reasons for exclusions at each stage, ideally with a flow diagram.                                                        | 8/<br>Supplemental 3     |
| Study characteristics              | 18 | For each study, present characteristics for which data were extracted (e.g., study size, PICOS, follow-up period) and provide the citations.                                                                           | 9/<br>Tables 1&2         |
| Risk of bias within studies        | 19 | Present data on risk of bias of each study and, if available, any outcome level assessment (see item 12).                                                                                                              | 13                       |

## Supplementary material

|                               |    |                                                                                                                                                                                                          |                |
|-------------------------------|----|----------------------------------------------------------------------------------------------------------------------------------------------------------------------------------------------------------|----------------|
| Results of individual studies | 20 | For all outcomes considered (benefits or harms), present, for each study: (a) simple summary data for each intervention group (b) effect estimates and confidence intervals, ideally with a forest plot. | 9-12, Figure 1 |
| Synthesis of results          | 21 | Present results of each meta-analysis done, including confidence intervals and measures of consistency.                                                                                                  | 9-12           |
| Risk of bias across studies   | 22 | Present results of any assessment of risk of bias across studies (see Item 15).                                                                                                                          | 12             |
| Additional analysis           | 23 | Give results of additional analyses, if done (e.g., sensitivity or subgroup analyses, meta-regression [see Item 16]).                                                                                    | 13             |
| <b>DISCUSSION</b>             |    |                                                                                                                                                                                                          |                |
| Summary of evidence           | 24 | Summarize the main findings including the strength of evidence for each main outcome; consider their relevance to key groups (e.g., healthcare providers, users, and policy makers).                     | 13             |
| Limitations                   | 25 | Discuss limitations at study and outcome level (e.g., risk of bias), and at review-level (e.g., incomplete retrieval of identified research, reporting bias).                                            | 15-16          |
| Conclusions                   | 26 | Provide a general interpretation of the results in the context of other evidence, and implications for future research.                                                                                  | 16             |
| <b>FUNDING</b>                |    |                                                                                                                                                                                                          |                |
| Funding                       | 27 | Describe sources of funding for the systematic review and other support (e.g., supply of data); role of funders for the systematic review.                                                               | Title Page     |

## Supplementary material

**Supplementary Table 2** Risk of bias assessments using Newcastle Ottawa Scale [21].

| Ref.               | Cohort selection (max 4) | Quotes for cohort selection                                                                                  | Comparability (max 2) | Quotes for cohort comparability                                                                                                | Assessment of outcomes (max 3) | Quote for assessment of outcomes                                                                                                   | Comments                                                  |
|--------------------|--------------------------|--------------------------------------------------------------------------------------------------------------|-----------------------|--------------------------------------------------------------------------------------------------------------------------------|--------------------------------|------------------------------------------------------------------------------------------------------------------------------------|-----------------------------------------------------------|
| <b>Coe 2013</b>    | ****                     | Selection of the cohort was representative, delivery of training was well-documented by study investigators. | **                    | For the present systematic review we are analyzing data from the intervention arm of an RCT, with before and after comparisons | **                             | Research personnel recorded the data and reviewed it with the endoscopists. Outcome assessment was not blinded. Complete follow-up |                                                           |
| <b>Berger 2017</b> | ***                      | A detailed explanation of the ascertainment of the exposure is not provided.                                 |                       | Self-controlled. No adjusted analyses were provided.                                                                           |                                | A detailed explanation of the assessment of the outcome, length of follow-up was not provided.                                     | Abstract format limits the description of the methodology |

## Supplementary material

|                      |      |                                                                                                              |    |                                                                                                                                |                                                                                                |                                                                                                             |
|----------------------|------|--------------------------------------------------------------------------------------------------------------|----|--------------------------------------------------------------------------------------------------------------------------------|------------------------------------------------------------------------------------------------|-------------------------------------------------------------------------------------------------------------|
| <b>Corley 2019</b>   | **   | A detailed explanation of the ascertainment of the exposure is not provided.                                 | *  | Adjusted analysis (Cox regression) was performed for one of the study outcomes                                                 | A detailed explanation of the assessment of the outcome, length of follow-up was not provided. | Abstract format limits the description of the methodology                                                   |
| <b>Hall 2010</b>     | **   | A detailed explanation of the ascertainment of the exposure is not provided.                                 |    | Self-controlled. No adjusted analyses were provided.                                                                           | A detailed explanation of the assessment of the outcome, length of follow-up was not provided. | Abstract format limits the description of the methodology                                                   |
| <b>Kaminski 2016</b> | **** | Selection of the cohort was representative, delivery of training was well-documented by study investigators. | ** | For the present systematic review we are analyzing data from the intervention arm of an RCT, with before and after comparisons | ***                                                                                            | Research personnel recorded the data in a database. Outcome assessment was not blinded. Complete follow-up. |

## Supplementary material

|                         |      |                                                                                                              |    |                                                                                                                                                                                       |     |                                                                                                               |
|-------------------------|------|--------------------------------------------------------------------------------------------------------------|----|---------------------------------------------------------------------------------------------------------------------------------------------------------------------------------------|-----|---------------------------------------------------------------------------------------------------------------|
| <b>Keswani<br/>2015</b> | **** | Selection of the cohort was representative, delivery of training was well-documented by study investigators. | *  | Self-controlled. Adjusted analyses were conducted.                                                                                                                                    | *** | Research personnel recorded the data in a database. Outcome assessment was not blinded. Complete follow-up.   |
| <b>Wallace<br/>2017</b> | **** | Selection of the cohort was representative, delivery of training was well-documented by study investigators. | ** | For the present systematic review, we are extracting and analyzing the data from the intervention arm of an RCT, with before and after comparisons. Adjusted analyses were conducted. | **  | Data was entered by physicians or nurse assistant into a data software (specifically designed for the study). |



## Supplementary material

---

|                       |     |                                                                                                                                                                                                                                        |   |                                                                                                                |     |                                                                                                                         |
|-----------------------|-----|----------------------------------------------------------------------------------------------------------------------------------------------------------------------------------------------------------------------------------------|---|----------------------------------------------------------------------------------------------------------------|-----|-------------------------------------------------------------------------------------------------------------------------|
| <b>Evans<br/>2019</b> | *** | The Colonoscopy<br>Clinical Skills<br>Program is well-<br>documented and<br>organized by the<br>Canadian<br>Association of<br>Gastroenterology.<br>Data was<br>obtained from<br>secure records<br>(i.e. electronic<br>medical records) | * | No adjusted<br>analyses were<br>provided,<br>however,<br>information<br>about<br>comparability<br>is provided. | *** | Adequate<br>follow up is<br>reported.<br>Outcome<br>assessment<br>was done<br>with<br>electronic<br>medical<br>records. |
|-----------------------|-----|----------------------------------------------------------------------------------------------------------------------------------------------------------------------------------------------------------------------------------------|---|----------------------------------------------------------------------------------------------------------------|-----|-------------------------------------------------------------------------------------------------------------------------|

---

## Supplementary material

**Supplementary Table 3a** Summary of characteristics of studies included in systematic review, but not meta-analysis, of primary outcome.

| Author, year | Study type | Country | Number of study sites | Endoscopists (N = ) | Colonoscopies (n = ) | Patient sex (% male) | Median patient age | Indication (% screening-related) |
|--------------|------------|---------|-----------------------|---------------------|----------------------|----------------------|--------------------|----------------------------------|
| Rank 2011    | OBS        | USA     | 5                     | N/R                 | N/R                  | N/R                  | N/R                | N/R                              |
| Salden 2012  | OBS        | USA     | 1                     | 9                   | 1,041/ 2,730         | N/R                  | N/R                | N/R                              |

OBS, observational study; GI, gastroenterologist; Sx, surgeon; NOS, Newcastle-Ottawa Scale<sup>27</sup>; N/R = not reported  
\*Conference abstract.

## Supplementary material

**Supplementary Table 3b** Summary of interventions and outcomes from studies included in systematic review, but not meta-analysis, of primary outcome.

| Author, year | Description of educational intervention                                                     | Frequency of intervention | Lag time after intervention* | Follow-up after measurement | Preintervention ADR  | Post-intervention ADR | Other outcomes reported |
|--------------|---------------------------------------------------------------------------------------------|---------------------------|------------------------------|-----------------------------|----------------------|-----------------------|-------------------------|
| Rank 2011    | Feedback on ADR and WT in addition to possible financial incentives for meeting WT targets. | N/R                       | N/R                          | 36 months                   | 28.0 (M)<br>20.0 (F) | 42.0 (M)<br>29.0 (F)  | SPDR                    |
| Salden 2012  | Lectures, video-training and individual feedback and supervision during colonoscopy.        | Once                      | None                         | 24 months                   | 17.2-32.4            | 25.4-32.7             | CIR,<br>pADR            |

ADR, adenoma detection rate; CIR, cecal intubation rate; WT, withdrawal time; SPDR, sessile polyp detection rate; PDR, polyp detection rate; ANDR, advanced neoplasia detection rate; CDR, cancer detection rate; N/R, not reported.

\*Lag time refers to time between intervention and start of post-intervention measurement of outcome(s).
